# Supplementary material
Source: PubMed Central journal article supplement (PMC2614605)
Supplement: fj.07-104257_1.pdf [file fj.07-104257_1.pdf]

## Supplemental Material

### **I. Abbreviations**

NeuAc: N-acetylneuraminic acid or sialic acid

Gal: Galactose

GlcNAc: N-acetyl-D-glucosamine

GalNAc: N-acetyl-D-galactosamine

Fuc: Fucose

SialylT: sialyltransferase

ST3[Gal $\beta$ 1,3GalNAc]: All enzymes responsible for  $\alpha$ 2,3sialylation of Gal $\beta$ 1,3GalNAc- (type III structure). This includes cloned ST3Gal-I and -II.

ST3[Gal $\beta$ 1,4GlcNAc]: All enzymes responsible for  $\alpha$ 2,3sialylation of Gal $\beta$ 1,4GlcNAc- (type II structure). This includes cloned ST3Gal-III, -IV and -VI.

ST6[Gal $\beta$ 1,4GlcNAc]: All enzymes responsible for  $\alpha$ 2,6sialylation of Gal $\beta$ 1,4GlcNAc- (type II structure). This includes cloned ST6Gal-I.

FT: fucosyltransferase

FT[Sialyl-LacNAc]: Enzyme(s) responsible for  $\alpha$ 1,3fucosylation of NeuAc $\alpha$ 2,3Gal $\beta$ 1,4GlcNAc- (Sialyl-LacNAc) structure

GalT: galactosyltransferase

GalNAcT: N-acetylgalactosaminyl transferase

GlcNAcT: N-acetylglucosaminyl transferase

SulfoT: sulfotransferase

LacNAc: N-acetyllactosamine or Gal $\beta$ 1,4GlcNAc

sLe<sup>X</sup>: sialyl Lewis X

F: Fluoro

Me: Methyl

Bn: Benzyl

HU: Hydroxyurea

PI: Propidium iodide

S-N: Sugar-nucleotide

### **II. Cell cycle analysis by propidium iodide (PI)**

For cell cycle analysis, samples containing  $0.2-0.4 \times 10^6$  cells at different time points in each of the different growth phases, before/after synchronization by HU, were collected, fixed with 80% ethanol in PBS and stored overnight at  $-20^\circ\text{C}$ . The next day, cells were pelleted by centrifugation and ethanol was discarded. The samples were then equilibrated for 5 min at  $37^\circ\text{C}$  in  $100\mu\text{l}$  SSC buffer (150mM sodium chloride, 15mM sodium citrate, pH=7.0). Following this,  $100\mu\text{g/ml}$  DNase-free RNase (Sigma) in SSC buffer was added for 20 min at  $37^\circ\text{C}$ , cells were washed twice in SSC, and resuspended in 1ml PBS for 15 min to allow rehydration. These cells were then centrifuged and resuspended in  $200\mu\text{l}$  Tris buffer (100mM Tris, 150mM NaCl, 1mM  $\text{CaCl}_2$ , 0.5mM  $\text{MgCl}_2$ , 0.1% Tween-20, pH 7.4) containing  $10\mu\text{g/ml}$

PI (propidium iodide) for 20 min in dark at room temperature. Following this, samples were analyzed using a FACSCalibur flow cytometer with CellQuest software. Acquired events were gated on FL2-W versus FL2-A to discriminate singlets from doublets and larger aggregates, and the distribution of singlet cells in various growth phases was quantified using the FL2-A histogram.

### **III. RNA isolation and real time RT-PCR of glycosyltransferase genes**

Total RNA was isolated using the SV total RNA isolation system (Promega, Madison, WI), and cDNA was synthesized from RNA using the iScript reverse transcriptase kit (Bio-Rad, Hercules, CA) according to manufacturer's instructions. Real time PCR reactions, using iQ SYBR-green Supermix (Bio-Rad), were performed on the My iQ Single-Color Real-Time PCR Detection System (Bio-Rad). Primer pairs for each mRNA, corresponding to PSGL-1 and an array of glycosyltransferase genes, were designed based on sequence information deposited in the GenBank (Supplemental Table S1). Relative mRNA levels are derived from  $\Delta\text{Ct}$ , the difference of the threshold cycle value of the target mRNA and the Ct value for RPL32, a ribosomal protein mRNA that was used as a reference standard.

### **IV. Cytometry-bead preparation**

Carbodiimide chemistry was used to link anti-PSGL-1 mAb TB5 (Mouse monoclonal IgG1 against protein N-terminus from BioVendor, Candler, NC) to 6 $\mu\text{m}$  carboxyl polystyrene beads (Polysciences, Warrington, PA). Briefly, these beads were activated overnight at RT with a mixture of 0.05M EDC (1-Ethyl-3-[3-dimethylaminopropyl]carbodiimide·HCl) and 0.05M sulfo-NHS (Pierce, Rockford, IL) in PBS buffer (pH=7.2). The next day, the beads were washed and resuspended in PBS (pH=7.8) containing 20 $\mu\text{g}$  TB5 (concentration of 0.2 mg/ml) for 2-3 hours at RT. Unreacted mAb was removed by washing and unreacted active sites were quenched with 40mM ethanolamine for 30 min. Bead surface was then blocked with PBS (pH=7.2) containing 1% BSA prior to use. Polystyrene beads thus obtained are termed "TB5-beads". Using the same procedure, an isotype matched mAb (anti-CD18/ $\beta$ 2-integrin, clone IB4) was conjugated to activated beads to prepare "IB4-beads".

## V. Glycosyltransferase reaction conditions

The following are the conditions for individual enzymatic assays:

- A. Sialyltransferase (*SialylT*):** Reaction temperature in all cases was 37°C.  $\alpha$ 2,3- and  $\alpha$ 2,6-sialyltransferase (*SialylT*) assay reactions proceeded for 2h in a mixture containing 100mM sodium cacodylate buffer (pH=6.0), 7.5mM acceptor, 0.2 $\mu$ Ci of CMP-[9-<sup>3</sup>H] NeuAc (specific activity=33.6Ci/mmol) and 5 $\mu$ l cell extract in a total volume of 20 $\mu$ l (1).
- B. N-acetylglucosaminyltransferase (*GlcNAcT*):**  $\beta$ 1,3- and  $\beta$ 1,2 *GlcNAcT* assay reactions were carried out for 2h. The reaction mixture in these cases contained 70mM Hepes buffer (pH=7.0), 7mM *GlcNAc*1,5 lactone (Toronto Research Chemicals, ON, Canada), 0.7mM 2-aceto-amido-1,2-dideoxy nojirimycin (Toronto Research Chemicals), 14mM Mn acetate, 5mM ATP, 2mM NaN<sub>3</sub>, 5mM synthetic acceptor or 100 $\mu$ g fetuin-based acceptor, 0.2 $\mu$ Ci of UDP-[6-<sup>3</sup>H]*GlcNAc* (specific activity=36Ci/mmol) and 10 $\mu$ l of cell extract in a total volume of 30 $\mu$ l.
- C. Galactosyltransferase (*GalT*):**  $\beta$ 1,4 Galactosyltransferase (*GalT*) and  $\beta$ 1,3*GalT* assay mixtures contained 100mM Hepes (pH=7.0), 7mM ATP, 20mM Mn acetate, 1mM UDP-Gal, 0.5mM acceptor, 0.05 $\mu$ Ci of UDP-[<sup>14</sup>C]Gal (327mCi/mmol) and 5 $\mu$ l cell extract in a total volume of 20 $\mu$ l. Reaction was carried out for 4h (2).
- D. Fucosyltransferase (*FT*):**  $\alpha$ 1,2-,  $\alpha$ 1,6-,  $\alpha$ 1,3- and  $\alpha$ 1,4-fucosyltransferase (*FT*) assay reactions were carried out for 2h in a reaction mixture containing 50mM Hepes buffer (pH=7.5), 5mM MnCl<sub>2</sub>, 7mM ATP, 3mM NaN<sub>3</sub>, 3mM synthetic acceptor or 40 $\mu$ g of fetuin-based acceptor, 0.05 $\mu$ Ci of GDP-[<sup>14</sup>C]Fuc (290mCi/mmol) and 5 $\mu$ l cell extract in a total volume of 20 $\mu$ l (3, 4).
- E. Sulfotransferase (*SulfoT*):** SulfoT assay reactions were run for 2h with 100mM Tris-maleate (pH=7.2), 5mM Mg acetate, 5mM ATP, 10mM NaF, 10mM BAL, 7.5mM acceptor, 0.5 $\mu$ Ci of [<sup>35</sup>S]PAPS (2.4Ci/mmol) and 10 $\mu$ l of cell extract in a volume of 30 $\mu$ l (5).
- F. ppGalNAc transferase (*ppGalNAcT*):** Reaction mixture (25 $\mu$ l) consists of 100mM Hepes buffer (pH=7.0) with protease inhibitor cocktail III (Calbiochem, La Jolla, CA), 7mM ATP, 20mM Mn acetate,

UDP-[6-<sup>3</sup>H]GalNAc diluted with cold UDP-GalNAc to a final concentration of 350μM (27,500 cpm/nmol), 10μl cell lysate (13μg/μl) and 50μg (520.4μM) of truncated PSGL-1 N-terminal sequence synthetic peptide (N-term acetylated QATEYEYLDYDFLPETEPPEMKHHHHHHLR, GenScript Corp., Piscataway, NJ). Reaction was carried out at 37°C for 4h. Separation of His-tagged peptide from the reaction mixture was carried out by addition of 1ml PBS buffer containing 500mM NaCl (binding buffer) to the reaction mixture along with MagneHis<sup>TM</sup> Ni particles (Promega, Madison, WI) for 30min at RT, followed by extensive (5-times) washing of these particles with binding buffer containing 10mM Imidazole. These particles were then added to 15ml of scintillation fluid and the radioactivity associated with peptide was quantified. Counts from blank control containing everything except the synthetic peptide were less than 10% of the sample signal.

## **VI. Acceptor specificity**

The following text describes the synthetic carbohydrate substrates used in enzymology based assays and potential enzyme activities that they measure. Also provided are a list of potential genes/enzymes that display this activity. Although the substrates have been specifically designed to distinguish between closely related enzymes, it is possible that multiple gene-products/enzymes could catalyze identical reactions on a given substrate. In this case, it is not possible to determine which enzyme is more important in mediating a particular activity. Further, while the text is based on current knowledge of Biochemistry, it is clear that the substrate specificity of glycosyltransferases is not fully defined at the current time.

### ***A. Sialyltransferase (SialylT)***

Acceptor specificity of sialyltransferases (SialylTs) is based on our recent paper (1). In this study, we show that while compound **1** (Figure 1A, main manuscript) is acted upon by both cloned  $\alpha$ 2,6 and  $\alpha$ 2,3 sialylTs, **2** and **3** can be applied to distinguish between these enzymes. In this regard,  $\alpha$ 2,3 sialylTs that act at the 3-position of Gal in Gal $\beta$ 1,3GalNAc (abbreviated ST3[Gal $\beta$ 1,3GalNAc]) act on **2** but not **3**. The  $\alpha$ 2,6 sialyltransferase ST6Gal-I and  $\alpha$ 2,3 sialylT specific for Gal $\beta$ 1,4GlcNAc (abbreviated ST3[Gal $\beta$ 1,4GlcNAc]) both act on **3** but not **2**. In order to distinguish between the last two enzymes, we use the acceptors 2-O-MeGal $\beta$ 1,3GlcNAc $\beta$ -O-Bn and 4-O-MeGal $\beta$ 1,4GlcNAc $\beta$ -O-Bn which are sialylated exclusively by ST3[Gal $\beta$ 1,3GlcNAc] and ST3[Gal $\beta$ 1,4GlcNAc] respectively. Our study suggests that these last two acceptors may not be sialylated by either ST6Gal-I or ST3[Gal $\beta$ 1,3GalNAc] (1).

With regard to the relationship between our designation of ST3[Gal $\beta$ 1,3GalNAc] and previously cloned sialyltransferases, two enzymes ST3Gal-I and ST3Gal-II predominantly act to sialylate Gal $\beta$ 1,3GalNAc (Type III) type oligosaccharides and have low activity towards Gal $\beta$ 1,4GlcNAc (Type II) or Gal $\beta$ 1,3GlcNAc (Type I) chains (6).

Three different sialyltransferases namely, ST3Gal-III, ST3Gal-IV and ST3Gal-VI act on Gal $\beta$ 1,4GlcNAc (Type II), consistent with their involvement in the formation of sLe<sup>x</sup> (7, 8). Of these ST3Gal-III shows strong preference towards Gal $\beta$ 1,3GlcNAc type (Type I) while ST3Gal-IV exclusively acts on Gal $\beta$ 1,4GlcNAc (Type II). The later enzyme is a major enzyme contributing to leukocyte selectin function in knockout mice models (9). ST3Gal-III expression has also been correlated with the formation of sLe<sup>x</sup> in lung carcinomas (10). In our studies, we attribute the activity on acceptor 2-O-MeGal $\beta$ 1,3GlcNAc $\beta$ -O-Bn by ST3[Gal $\beta$ 1,3GlcNAc] to ST3Gal-III, while activity towards 4-O-MeGal $\beta$ 1,4GlcNAc $\beta$ -O-Bn by ST3[Gal $\beta$ 1,4GlcNAc] is likely due to both ST3Gal-IV and -VI.

### ***B. Galactosyltransferase (GalT)***

Acceptor specificity of GalT is based on our earlier studies (2). GlcNAc $\beta$ 1,6GalNAc $\alpha$ -O-Bn was used as an acceptor for both the attachment of Gal to the 4-position of GlcNAc and for the attachment of Gal to the 3-position of GalNAc. 3-O-MeGal $\beta$ 1,3(GlcNAc $\beta$ 1,6)GalNAc $\alpha$ -O-Bn was used to examine the activity of only the former enzyme in the absence of the later. Similarly 4-F-GlcNAc $\beta$ 1,6GalNAc $\alpha$ -O-Bn and GalNAc $\alpha$ -O-Bn were used to study GalT activity at the 3-position of GalNAc (core 1  $\beta$ 1,3GalT-I). A combination of two cloned  $\beta$ 1,4GalTs,  $\beta$ 1,4GalT-I and -IV, likely act on 3-O-MeGal $\beta$ 1,3(GlcNAc $\beta$ 1,6)GalNAc $\alpha$ -O-Bn in our assay. Of these, GalT-IV is a major enzyme involved in the formation of polyLacNAc structures in O-glycans, while GalT-I has similar function in N-glycans (11).

### ***C. N-acetylglucosaminyl transferase (GlcNAcT)***

The primary goal of our studies of GlcNAcT is to compare the attachment of GlcNAc to the 3-position of Gal in either the Gal $\beta$ 1,4GlcNAc (Type II) or Gal $\beta$ 1,3GalNAc (Type III) residues. In this regard, Compound **3** and the tetrasaccharide Gal $\beta$ 1,4GlcNAc $\beta$ 1,3Gal $\beta$ 1,4GlcNAc $\beta$ -O-Bn quantify the extension of lactosamine (LacNAc) type structures (referred to as LacNAc extension  $\beta$ 1,3GlcNAcT activity). Compound **2** on the other hand measures the rate of Core-1 extension (referred to as Core-1

extension  $\beta$ 1,3GlcNAcT activity). Data for Globo-H ( $\text{Gal}\beta$ 1,3 $\text{GalNAc}\beta$ 1,3 $\text{Gal}\alpha$ -O-Me) and fetuin triantennary acceptor are also provided.

#### ***D. Fucosyltransferase (FT)***

Previous studies with FTs guide the choice of acceptor specificities (3, 12). Different FTs (FT-IV/-V/-VI/-IX) can fucosylate the LacNAc chain in the core-2 structures. Among these, the myeloid  $\alpha$ 1,3FT-IV is abundant in HL-60 cells while  $\alpha$ 1,3 FT-IX is the main enzyme involved in CD15/Le<sup>x</sup> epitope formation in neutrophils. Both these enzymes act more efficiently on  $\text{Gal}\beta$ 1,4GlcNAc $\beta$  (LacNAc) compared to sialyl-LacNAc ( $\text{NeuAc}\alpha$ 2,3 $\text{Gal}\beta$ 1,4GlcNAc $\beta$ ) (12-14).  $\alpha$ 1,3FT-VII, on the other hand, exclusively transfers Fuc to sialyl-LacNAc. Among the FTs, only  $\alpha$ 1,3/4FT-III acts on  $\text{Gal}\beta$ 1,3GlcNAc $\beta$ - to give Le<sup>a</sup> (Lewis-a) type structures.  $\text{GlcNAc}\beta$ 1,4GlcNAc $\beta$ -O-Bn is used as a specific acceptor for FT-VI. While most FTs attach fucose to the GlcNAc $\beta$  residue, only  $\alpha$ 1,2FT attaches fucose to Gal $\beta$  in the formation of blood group type antigens. Thus, Gal $\beta$ -O-Bn is used to measure  $\alpha$ 1,2FT activity. Further, acceptors where the 2-position of Gal is blocked with a methyl substituent, 2-O-MeGal $\beta$ 1,4GlcNAc $\beta$ -O-Bn and 2-O-MeGal $\beta$ 1,3GlcNAc $\beta$ -O-Bn, were used for the measurement of  $\alpha$ 1,3FT-IV/FT-IX and  $\alpha$ 1,3/4 FT-III exclusively in the absence of  $\alpha$ 1,2FT activity.

#### ***E. Sulfotransferase (sulfoT)***

Core-2 based acceptors were also used to examine sulfotransferase activity. Previously, we have shown that Compound **1** is acted upon by Gal:3-O-sulfotransferases (clones Gal3ST-2, -3 and -4) (5). Among the Gal:3-O-sulfotransferases, while compound **2** was specific for Gal3ST-4 compound **3** was acted upon by Gal3ST-2 and -3. The trisaccharide 3-O-MeGal $\beta$ 1,3(GlcNAc $\beta$ 1,6)GalNAc $\alpha$ -O-Bn was acted upon by GlcNAc:6-O-sulfotransferase but not the Gal:3-O-sulfotransferases. Finally, all compounds (**1**, **2** and **3**) can serve as a substrate for GlcNAc:6-O-sulfotransferases.

## VII. Deriving *in vivo* estimates of rate constants ( $k_{vivo}$ ) from *in vitro* experimental data<sup>1</sup>

An explicit relation between the apparent first order rate constant ( $k$ ) reported for our *in vitro* assay (Table 2, main manuscript) and that which is expected *in situ* or *in vivo* ( $k_{vivo}$ ) is derived. This derivation is based on the concept that glycosyltransferase reactions proceed via a bi-bi reaction mechanism (Eq. S1). The exact mechanism followed depends on the individual glycosyltransferase, the relative concentrations of the acceptor (A) and activated monosaccharide/sugar-nucleotide (M) in the reaction mixture (15, 16). Depending on the circumstance, either enzyme-acceptor (EA) complex or enzyme-monosaccharide (EM) complex formation can precede enzyme-monosaccharide-acceptor (EMA) complex formation. In the final step, the nucleotide (N) and glycan product (P) are formed.

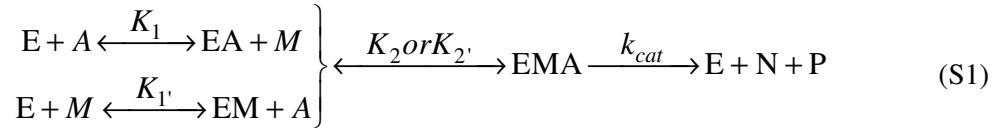

Based on the above scheme, the following are reaction velocity expressions under our *in vitro* experimental and *in vivo* conditions:

***In vitro* estimates for Sialyl-, Fucosyl- and GlcNAc- transferase activity.** Under our *in vitro* assay conditions, [EA] formation likely precedes [EMA] since  $[A]_{vitro} \gg [M]_{vitro}$  and  $[A]_{vitro} > K_{M, acc}$  (Table S2). Thus, the reaction is limited by monosaccharide rather than acceptor concentration (upper reaction in Eq. 1). Using the rapid equilibrium assumption<sup>2</sup>, an expression for the velocity of product formation ( $V_{vitro}$ ) can be derived:

$$V_{vitro} = k_{cat} \cdot \frac{[E_0]_{vitro}}{K_2 \left( \frac{K_1}{[A]_{vitro}} + 1 \right) + [M]_{vitro}} \cdot [M]_{vitro} = k_{cat} \cdot \frac{[E_0]_{vitro} [M]_{vitro}}{K_{M, mono} + [M]_{vitro}} \quad (S2)$$

<sup>1</sup> Many of the mathematical expressions have either *vitro* or *vivo* in subscript, for example  $[M]_{vitro}$  and  $k_{vivo}$ . The subscript *vitro* is used for measurements/parameters associated with the *in vitro* enzymology studies. The subscript *vivo* is used to describe the same parameter *in situ/in vivo* in the cellular Golgi.

<sup>2</sup> Rapid equilibrium assumption involves solving the following equations simultaneously:  $K_1 = [E][A]/[EA]$ ;  $K_2 = [EA][M]/[EMA]$ ;  $[E_0] = [E] + [EA] + [EMA]$ ;  $V_{vitro} (=k_{cat}[EMA])$



Here, terms in square brackets ( [ ] ) denote concentration of individual species and the Michaelis-Menten constant ( $K_{M, mono} = K_2 (K_1 / [A] + 1)$ ) is calculated with respect to the monosaccharide since this is the rate limiting species. Further, since  $K_{M, mono} > [M]_{vitro}$ , the above expression simplifies to:

$$V_{vitro} = k_{cat} \cdot \frac{[E_0]_{vitro} [M]_{vitro}}{K_{M, mono}} = k [M]_{vitro} \quad (S3)$$

where  $k$  is the apparent first order rate constant that is quantified in our assays in Table 2.

**In situ/vivo enzyme kinetics.** *In situ*,  $[M]_{vivo} \gg [A]_{vivo}$  and  $[M]_{vivo} \gg K_{M, mono}$ . Thus, the reaction velocity *in vivo* ( $V_{vivo}$ ) derived similar to above is:

$$V_{vivo} = k_{cat} \cdot \frac{[E_0]_{vivo} [A]_{vivo}}{K_{M, acc} + [A]_{vivo}} \quad (S4)$$

Similar to above,  $K_{M, acc} = K_1 \cdot (K_2 / [M] + 1)$ . Further simplification is possible since  $K_{M, acc} \gg [A]_{vivo}$ . Thus, the above expression can be simplified to a first order reaction with respect to acceptor concentration,  $[A]_{vivo}$ .

$$V_{vivo} = \left( k_{cat} \cdot \frac{[E_0]_{vivo}}{K_{M, acc}} \right) \cdot [A]_{vivo} = k_{vivo} [A]_{vivo} \quad (S5)$$

where,  $k_{vivo} = k_{cat} \cdot \frac{[E_0]_{vivo}}{K_{M, acc}}$ . Assuming that  $k_{cat}$  is the same both *in vivo* and *in vitro*, it follows from Eq. S3

and S5 that:

$$k_{vivo} = k \cdot \frac{[E_0]_{vivo}}{[E_0]_{vitro}} \cdot \frac{K_{M, mono}}{K_{M, acc}} \quad (S6)$$

In the above expression since  $[E_0]_{vivo} / [E_0]_{vitro}$  is the same for all enzymes (it is the ratio of enzyme concentration in Golgi with respect to that in *in vitro* enzyme assays). Thus, it follows that  $k_{vivo}$  is proportional to  $k \cdot (K_{M, mono} / K_{M, acc})$ .

**Table S1: Quantitative RT-PCR primers used to assay glycosyltransferase transcripts**

| <b>Enzyme/Protein</b> | <b>Gene Name</b> | <b>GenBank Accession #</b> | <b>Forward primer (5'→3')</b> | <b>Reverse primer (5'→3')</b> |
|-----------------------|------------------|----------------------------|-------------------------------|-------------------------------|
| PSGL-1*               | SELPLG           | NM_003006                  | GCAGATGAAGCCGAGAAAGC          | CAGTCAGAGGAGTGGTGTCTAG        |
| ST6Gal-I*             | ST6GAL1          | NM_173216                  | GGACCCATCTGTATACCACTC         | ATGTCCCATAGCTCCCAAGG          |
| ST3Gal-VI*            | ST3GAL6          | NM_006100                  | GGCACCTGTGGAAATGAAAC          | AACTTATCGCTACCATAACAAGG       |
| ST3Gal-IV*            | ST3GAL4          | NM_006278                  | CCCATCTTCCTGCGGCTTG           | CCTGAGGCTCTGGATGTTCTTG        |
| ST3Gal-III            | ST3GAL3          | NM_174963                  | TGATCGGTTGGGCTTCCTC           | GGTGCTGGCTTGGAGAAC            |
| ST3Gal-II             | ST3GAL2          | NM_006927                  | CTTCAAGTATATCCACGACAG         | CAGTAGTGGTGCCAGTTG            |
| ST3Gal-I              | ST3GAL1          | NM_003033                  | GCAAAGATCAGAGTGAAACAG         | CACCTCATCGCAGACATG            |
| α1,3FT-VII            | FUT7             | NM_004479                  | CTCCGAGGCATCTTCAAC            | CTCCTGGAAGTTGCTGAC            |
| α1,3FT-IV             | FUT4             | NM_002033                  | GTGTTGGACTACGAGGAG            | CCAGTTGAAGAGGTTACTTG          |
| Core 2                | C2GNT /          | NM_001097634               | AAGGTGGAAGAAGCGGTATGAG        | CTGACCACGAAGTAGGCACTG         |
| β1,6GlcNAcT-I*        | GCNT1            |                            |                               |                               |
| Core 1                | C1GALT1          | NM_020156                  | AGCAGGAGATTCCAGAGATACC        | TCAGAGCAGCAACCAGGAC           |
| β1,3GalT-I            |                  |                            |                               |                               |
| β1,4GalT-IV*          | B4GALT4          | AB024436                   | GGCGAAGACGATGACCTCAG          | ATCCGTTCTGCGTTCACCTC          |
| β1,4GalT-I            | B4GALT1          | NM_001497                  | TCATCATTCCATTCCGCAACC         | ATTGAGGAGCTTAGCACGATTG        |
| β1,3GlcNAcT-3         | B3GNT3           | NM_014256                  | GACTTCCACGACTCCTTCTTC         | CGTCATCATCCCCGTTGAG           |
| β1,3GlcNAcT-2*        | B3GNT2           | NM_006577                  | TGGAACCGAGAGCAAGAG            | TCAGATGGCTTATATTGGAGAG        |
| β1,3GlcNAcT-1         | B3GNT1           | NM_006876                  | GGCACCAATGTCTCCTAC            | CACTGGTTGCTCTGATCC            |
| RPL32                 | RPL32            | NM_000994                  | AGCGTAACTGGCGGAAAC            | CGTTGTGGACCAGGAACTTC          |

\* PCR products for these genes were purified from agarose gel and sequenced to confirm validity of the RT-PCR assay.

These are the primary genes products from which important conclusions are drawn in this manuscript.

Table S2: Enzymology experiment parameters: Studies with HL-60 cells <sup>a</sup>

| 1. Enzyme                                 | 2. Acceptor used <sup>b</sup>                     | 3. Sugar-nucleotide (S-N) | 4. Acceptor ([A] <sub>vitro</sub> , μM) | 5. Reaction time (hr) | 6. Cell lysate <sup>c</sup> (μg) | 7. Radioactive S-N (μM) | 8. Unlabeled S-N <sup>d</sup> (μM) | 9. S-N in assay from cell source <sup>e</sup> (μM) | 10. Consumption of radio-sugar <sup>a</sup> (%) | 11. $K_M$ for S-N ( $K_{M, mono}$ , μM) (Reference) <sup>f</sup> | 12. $K_M$ for acceptor ( $K_{M, acc}$ , μM) (Reference) <sup>f</sup> |
|-------------------------------------------|---------------------------------------------------|---------------------------|-----------------------------------------|-----------------------|----------------------------------|-------------------------|------------------------------------|----------------------------------------------------|-------------------------------------------------|------------------------------------------------------------------|----------------------------------------------------------------------|
| <b><u>Sialyltransferase</u></b>           |                                                   |                           |                                         |                       |                                  |                         |                                    |                                                    |                                                 |                                                                  |                                                                      |
| ST3[Galβ1,3GalNAc]                        | Galβ1,3(3-O-MeGalβ1,4GlcNAcβ1,6)GlcNAcα-O-Bn (#2) | CMP-NeuAc                 | 7500                                    | 2                     | 36.5                             | 0.2976                  | -                                  | 0.4928                                             | 0.6                                             | 23 (17)                                                          | 400 (18)                                                             |
| ST3[Galβ1,4GlcNAc]                        | 4-O-Me Galβ1,4 GlcNAcβ-O-Bn                       | CMP-NeuAc                 | 7500                                    | 2                     | 36.5                             | 0.2976                  | -                                  | 0.4928                                             | 0.6                                             | 74.1 (19)                                                        | 300 (20, 21)                                                         |
| ST3[Galβ1,4GlcNAc] and ST6[Galβ1,4GlcNAc] | 3-O-MeGalβ1,3(Galβ1,4GlcNAcβ1,6)GalNAcα-O-Bn (#3) | CMP-NeuAc                 | 7500                                    | 2                     | 36.5                             | 0.2976                  | -                                  | 0.4928                                             | 0.6                                             | 74.1 (19)                                                        |                                                                      |
| <b><u>Galactosyltransferase</u></b>       |                                                   |                           |                                         |                       |                                  |                         |                                    |                                                    |                                                 |                                                                  |                                                                      |
| β1,4GalT                                  | 3-O-Me Galβ1,3 (GlcNAcβ1,6) GalNAcα-O-Bn          | UDP-Gal                   | 500                                     | 4                     | 36.5                             | 7.6453                  | 1000                               | 1.3724                                             | 9.9                                             | 31 (22)                                                          | 290 (11, 23)                                                         |
| β1,3GalT                                  | 4-Fluoro GlcNAcβ1,6 GalNAcα-O-Bn                  | UDP-Gal                   | 500                                     | 4                     | 36.5                             | 7.6453                  | 1000                               | 1.3724                                             | 2.6                                             | 630 (24)                                                         |                                                                      |
| <b><u>Fucosyltransferase</u></b>          |                                                   |                           |                                         |                       |                                  |                         |                                    |                                                    |                                                 |                                                                  |                                                                      |
| α1,3FT                                    | 2-O-Me Galβ1,4 GlcNAcβ-O-Bn                       | GDP-Fuc                   | 3000                                    | 2                     | 36.5                             | 8.6207                  | -                                  | 0.3289                                             | 12.7                                            | 10 (15)                                                          | 1500 (16)                                                            |
| α1,3FT[Sialyl-LacNAc]                     | NeuAcα2,3Galβ1,4 GlcNAcβ-O-Bn                     | GDP-Fuc                   | 3000                                    | 2                     | 36.5                             | 8.6207                  | -                                  | 0.3289                                             | 3.4                                             | 16.4 (25)                                                        | 3080 (25)                                                            |
| <b><u>GlcNAc transferase</u></b>          |                                                   |                           |                                         |                       |                                  |                         |                                    |                                                    |                                                 |                                                                  |                                                                      |
| LacNAc extension β1,3GlcNAcT              | 3-O-MeGalβ1,3(Galβ1,4GlcNAcβ1,6)GalNAcα-O-Bn (#3) | UDP-GlcNAc                | 5000                                    | 2                     | 73                               | 0.1852                  | -                                  | 3.4115                                             | 5.1                                             | 200 (26)                                                         | 710 (11)                                                             |
| <b><u>GalNAc transferase</u></b>          |                                                   |                           |                                         |                       |                                  |                         |                                    |                                                    |                                                 |                                                                  |                                                                      |
| ppGalNAcT                                 | Truncated PSGL-1 N-terminal sequence peptide      | UDP-GalNAc                | 520.4                                   | 4                     | 130                              | 350 (27500cpm/nmol)     |                                    | Not known                                          | 0.32 <sup>g</sup>                               | 10-62 (27)                                                       | 20 (27)                                                              |

<sup>a</sup> acceptor + [<sup>3</sup>H/<sup>14</sup>C]sugar-nucleotide donor + cell lysate (containing glycosyltransferase) → [<sup>3</sup>H/<sup>14</sup>C] product. Radioactive product is isolated using Dowex/C-18 chromatography or Nickel beads, and measured using scintillation counter. Based on this measurement, the amount of consumed radioactive-sugar nucleotide is quantified.

<sup>b</sup> All acceptor compounds were chemically synthesized. Composition was validated using NMR and Mass Spectrometry (see references (28-32)).

<sup>c</sup> Cell lysate amount used in each assay. This lysate contains the glycosyltransferase.

<sup>d</sup> In GalT assays only, 1mM unlabeled sugar nucleotide was added to the reaction mixture in addition to the radio-labeled sugar-nucleotide.

<sup>e</sup> Estimated based on amount of S-N reported in mammalian cells by Tomiya *et. al.*(33) and amount of cell lysate used in each assay (see footnote c).

<sup>f</sup> As seen, acceptor is in large excess compared to sugar-nucleotide in all cases except for GalT where 1mM exogenous UDP-Gal is added.  $K_M$  values are tabulated from various sources in literature under conditions where either sugar-nucleotide is limiting ( $K_M$  for S-N,  $K_{M, mono}$ ) or acceptor is limiting ( $K_M$  for acceptor,  $K_{M, acc}$ ).

<sup>g</sup> Estimated value based on transfer of GalNAc to the synthetic peptide.

Table S3: Glycosyltransferase analysis with cell cycle

| Enzyme                                  | Acceptor                                          | % glycosyltransferase activity at specified times <sup>a</sup> |       |       |       |       |       |
|-----------------------------------------|---------------------------------------------------|----------------------------------------------------------------|-------|-------|-------|-------|-------|
|                                         |                                                   | 0h <sup>a</sup>                                                | 13h   | 20h   | 24h   | 31h   | 38h   |
| <b><u>Sialyltransferase</u></b>         |                                                   |                                                                |       |       |       |       |       |
| ST3[Galβ1,3GalNAc]                      | Galβ1,3(3-O-MeGalβ1,4GlcNAcβ1,6)GalNAcα-O-Bn (#2) | 100.0                                                          | 96.1  | 100.8 | 107.2 | 111.5 | 141.5 |
| ST3[Galβ1,3GlcNAc]                      | 2-O-MeGalβ1,3GlcNAcβ-O-Bn                         | 100.0                                                          | 78.5  | 76.3  | 101.1 | 108.6 | 92.5  |
| ST3[Galβ1,4GlcNAc] & ST6[Galβ1,4GlcNAc] | 3-O-MeGalβ1,3(Galβ1,4GlcNAcβ1,6)GalNAcα-O-Bn (#3) | 100.0                                                          | 48.0  | 49.9  | 54.4  | 64.1  | 81.6  |
| <b><u>Galactosyltransferase</u></b>     |                                                   |                                                                |       |       |       |       |       |
| β1,4GalT & β1,3GalT                     | GlcNAcβ1,6GalNAcα-O-Bn                            | 100.0                                                          | 91.6  | 94.5  | 99.5  | 97.7  | 103.5 |
| β1,3GalT                                | 4-F-GlcNAcβ1,6GalNAcα-O-Bn                        | 100.0                                                          | 120.9 | 115.2 | 125.5 | 118.7 | 112.5 |
| β1,4GalT                                | Galβ1,3(GlcNAcβ1,6)GalNAcα-O-Al                   | 100.0                                                          | 86.3  | 91.0  | 96.8  | 94.9  | 100.7 |
| β1,4GalT                                | 3-O-MeGalβ1,3(GlcNAcβ1,6)GalNAcα-O-Bn             | 100.0                                                          | 74.9  | 78.8  | 83.3  | 81.2  | 88.1  |
| <b><u>GlcNAc transferase</u></b>        |                                                   |                                                                |       |       |       |       |       |
| β1,3GlcNAcT                             | 3-O-MeGalβ1,3(Galβ1,4GlcNAcβ1,6)GalNAcα-O-Bn (#3) | 100.0                                                          | 54.4  | 60.5  | 65.6  | 60.9  | 95.8  |
| <b><u>Fucosyltransferase</u></b>        |                                                   |                                                                |       |       |       |       |       |
| α1,3FT                                  | 2-O-MeGalβ1,4GlcNAcβ-O-Bn                         | 100.0                                                          | 106.2 | 106.5 | 115.1 | 109.0 | 108.9 |
| α1,3FT                                  | GalNAcβ1,4GlcNAcβ-O-Bn                            | 100.0                                                          | 109.0 | 106.8 | 115.0 | 114.2 | 109.5 |
| α1,3FT[Sialyl-LacNAc]                   | NeuAcα2,3Galβ1,4GlcNAcβ-O-Bn                      | 100.0                                                          | 101.1 | 101.4 | 119.7 | 114.1 | 99.4  |
| α1,6FT                                  | Fetuin triantennary asialo agalacto glycopeptide  | 100.0                                                          | 70.2  | 65.9  | 83.7  | 82.7  | 76.1  |

<sup>a</sup> CPM data are presented as % with respect to HL-60 cells cultured in the absence of hydroxyurea.

ACCEPTOR + [<sup>3</sup>H/<sup>14</sup>C]sugar-nucleotide donor + cell lysate (containing glycosyltransferase)↓  
[<sup>3</sup>H/<sup>14</sup>C] PRODUCT↓  
Purify [<sup>3</sup>H/<sup>14</sup>C] PRODUCT using Dowex/C-18 chromatography and confirm unique product using TLC

| Product /lane | Enzyme assayed                          | Acceptor                                          | Donor sugar-nucleotide       |
|---------------|-----------------------------------------|---------------------------------------------------|------------------------------|
|               | <b>Sialyltransferase</b>                |                                                   |                              |
| I             | ST3[Galβ1,3GalNAc]                      | Galβ1,3(3-O-MeGalβ1,4GlcNAcβ1,6)GalNAcα-O-Bn (#2) | CMP-[ <sup>3</sup> H]NeuAc   |
| II            | ST3[Galβ1,4GlcNAc] & ST6[Galβ1,4GlcNAc] | 3-O-MeGalβ1,3(Galβ1,4GlcNAcβ1,6)GalNAcα-O-Bn (#3) | CMP-[ <sup>3</sup> H]NeuAc   |
|               | <b>Fucosyltransferase</b>               |                                                   |                              |
| III           | α1,3FT                                  | 2-O-MeGalβ1,4GlcNAcβ-O-Bn                         | GDP-[ <sup>14</sup> C]Fuc    |
| IV            | α1,3FT                                  | Galβ1,4GlcNAcβ1,3Galβ1,4GlcNAcβ-O-Bn              | GDP-[ <sup>14</sup> C]Fuc    |
|               | <b>Galactosyltransferase</b>            |                                                   |                              |
| V             | β1,4GalT                                | 3-O-MeGalβ1,3(GlcNAcβ1,6)GalNAcα-O-Bn             | UDP-[ <sup>14</sup> C]Gal    |
| VI            | β1,3GalT                                | 4-F-GlcNAcβ1,6GalNAcα-O-Bn                        | UDP-[ <sup>14</sup> C]Gal    |
|               | <b>GlcNAc transferase</b>               |                                                   |                              |
| VII           | LacNAc extension β1,3GlcNAcT            | 3-O-MeGalβ1,3(Galβ1,4GlcNAcβ1,6)GalNAcα-O-Bn (#3) | UDP-[ <sup>14</sup> C]GlcNAc |
| VIII          | LacNAc extension β1,3GlcNAcT            | Galβ1,4GlcNAcβ1,3Galβ1,4GlcNAcβ-O-Bn              | UDP-[ <sup>14</sup> C]GlcNAc |

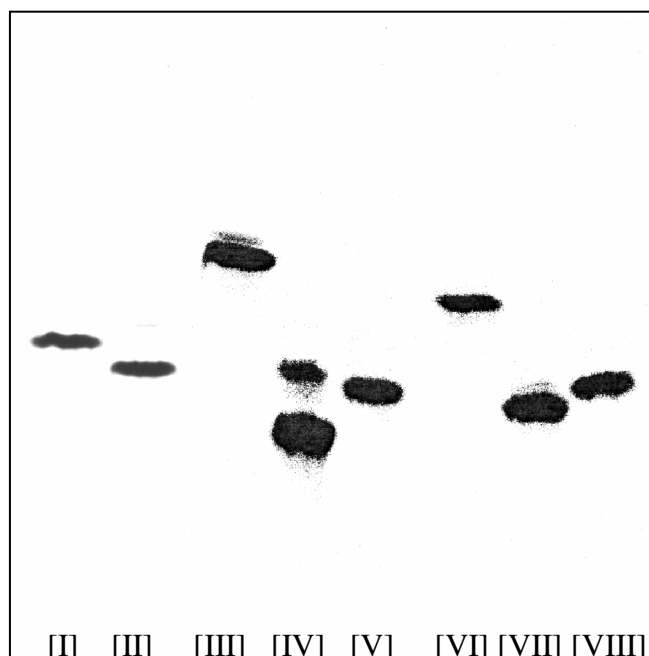

**Figure S1. Specific/unique radioactive products are formed in our assays:** The radioactive product(s) of eight typical enzymatic assays (acceptor and sugar-nucleotides in individual lanes are listed in Table above) was separated from unreacted sugar-nucleotide donors using chromatography techniques described in Methods. Products were separated using silica gel GHLF thin layer chromatography plates (Analtech) with 1-Propanol/NH<sub>4</sub>OH/H<sub>2</sub>O (12/2/5, v/v) as the mobile phase. Radioactive products were visualized either by fluorography at -70°C using Biomax Light film (Eastman Kodak) after spraying the TLC plates with Enhance (Dupont) in the case of <sup>3</sup>H-labeled products (lanes I, II), or by using the Cyclone phosphorimager system with SR screen (PerkinElmer) in the case of <sup>14</sup>C-labeled products (III-VIII). TLC shows that unique products are formed for each of the eight reactions except lane IV. This is expected since the acceptor used in lane IV (Galβ1,4GlcNAcβ1,3Galβ1,4GlcNAcβ-O-Bn) has two sites of fucosylation. Thus, as seen both mono- and di-fucosylated products are formed here. Besides TLC analysis of products, mass spectrometry analysis of selected reaction products has been performed in our earlier publications (1, 34).

Figure S2  
Marathe *et al.*

| Enzyme                     | Donor                  | Acceptor                                                                           |
|----------------------------|------------------------|------------------------------------------------------------------------------------|
| $\beta$ 1,4GalT            | UDP-[ $^{14}$ C]Gal    | 3-O-MeGal $\beta$ 1,3(GlcNAc $\beta$ 1,6)GalNAc $\alpha$ -O-Bn                     |
| $\beta$ 1,3GalT            | UDP-[ $^{14}$ C]Gal    | GalNAc $\alpha$ -O-Bn                                                              |
| $\beta$ 1,3GlcNAcT         | UDP-[ $^{14}$ C]GlcNAc | 3-O-MeGal $\beta$ 1,3(Gal $\beta$ 1,4GlcNAc $\beta$ 1,6)GalNAc $\alpha$ -O-Bn (#3) |
| ST3[Gal $\beta$ 1,3GalNAc] | CMP-[ $^{14}$ C]NeuAc  | Gal $\beta$ 1,3GalNAc $\alpha$ -O-Bn                                               |
| $\alpha$ 1,3FucT           | GDP-[ $^{14}$ C]Fuc    | GalNAc $\beta$ 1,4GlcNAc $\beta$ -O-Bn                                             |

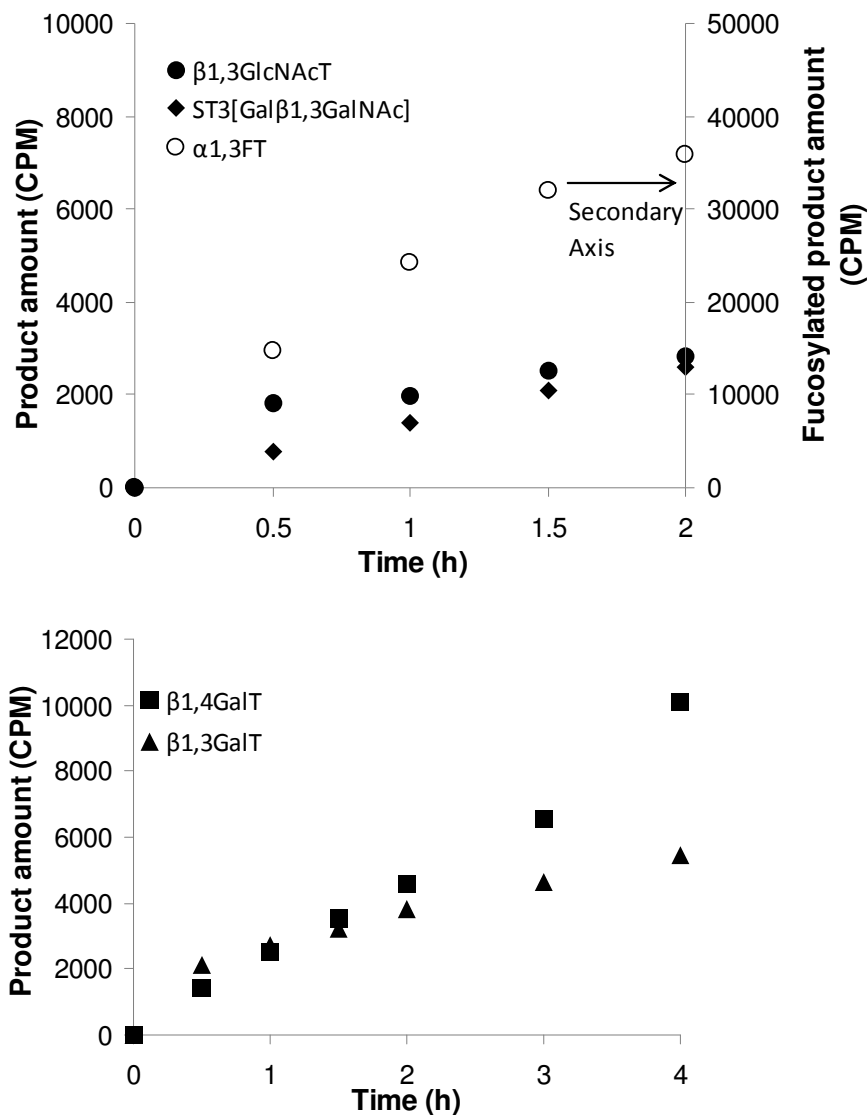

**Figure S2. Time course data:** Activity assays were performed for selected enzymes using corresponding acceptors mentioned in Table above, under conditions outlined in Methods. Extent of reaction was measured, following chromatographic separation of product, at different time points using scintillation counter. Data suggest that product formation varies approximately linearly during the time course of our assays: 2h for sialylT, FT and GlcNAcT, and 4h for GalT.

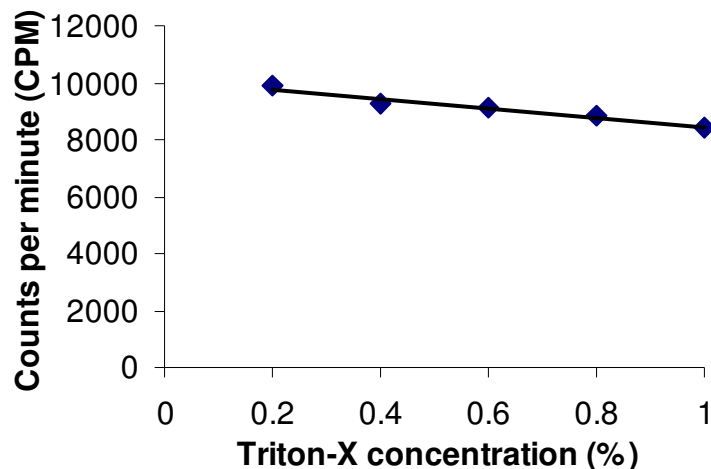

**Figure S3. Effect of detergent:** Transfer of sialic acid from CMP-[ $^{14}\text{C}$ ]NeuAc (donor) to core-2 acceptor (Compound 2) was measured using HL-60 cell extract as a source of sialyltransferase (ST3[Gal $\beta$ 1,3GalNAc]). Each 20 $\mu\text{l}$  reaction volume contained 7.5mM acceptor, 2 $\mu\text{l}$  of HL-60 cell extract and CMP-[ $^{14}\text{C}$ ]NeuAc. Triton-X concentration was varied from 0.2-1.0% while holding all other parameters at the same level in all runs. Radioactive product separated using Sep-Pak column was quantified using scintillation counter for each Triton-X concentration. CPM values quantify the extent of reaction in 2h. Concentration of detergent in assays reported in this paper is 0.5% Triton-X for GalT, FT and sialylT, and 0.66% for GlcNAcT. Varying detergent concentration has less than 10% effect on rate constants reported in this paper.

Supplemental Material References

1. Chandrasekaran, E. V., Xue, J., Xia, J., Chawda, R., Piskorz, C., Locke, R. D., Neelamegham, S., and Matta, K. L. (2005) Analysis of the specificity of sialyltransferases toward mucin core 2, globo, and related structures. identification of the sialylation sequence and the effects of sulfate, fucose, methyl, and fluoro substituents of the carbohydrate chain in the biosynthesis of selectin and siglec ligands, and novel sialylation by cloned alpha2,3(O)sialyltransferase. *Biochemistry* **44**, 15619-15635
2. Chandrasekaran, E. V., Jain, R. K., and Matta, K. L. (1992) Mucin biosynthesis revisited. The enzymatic transfer of Gal in beta 1,3 linkage to the GalNAc moiety of the core structure R1-GlcNAc beta 1,6GalNAc alpha-O-R2. *J Biol Chem* **267**, 19929-19937
3. Chandrasekaran, E. V., Jain, R. K., Larsen, R. D., Wlasichuk, K., DiCioccio, R. A., and Matta, K. L. (1996) Specificity analysis of three clonal and five non-clonal alpha 1,3-L-fucosyltransferases with sulfated, sialylated, or fucosylated synthetic carbohydrates as acceptors in relation to the assembly of 3'-sialyl-6'-sulfo Lewis x (the L-selectin ligand) and related complex structures. *Biochemistry* **35**, 8925-8933
4. Chandrasekaran, E. V., Chawda, R., Locke, R. D., Piskorz, C. F., and Matta, K. L. (2002) Biosynthesis of the carbohydrate antigenic determinants, Globo H, blood group H, and Lewis b: a role for prostate cancer cell alpha1,2-L-fucosyltransferase. *Glycobiology* **12**, 153-162
5. Chandrasekaran, E. V., Lakhaman, S. S., Chawda, R., Piskorz, C. F., Neelamegham, S., and Matta, K. L. (2004) Identification of physiologically relevant substrates for cloned Gal: 3-O-sulfotransferases (Gal3STs): distinct high affinity of Gal3ST-2 and LS180 sulfotransferase for the globo H backbone, Gal3ST-3 for N-glycan multiterminal Galbeta1, 4GlcNAcbeta units and 6-sulfoGalbeta1, 4GlcNAcbeta, and Gal3ST-4 for the mucin core-2 trisaccharide. *J Biol Chem* **279**, 10032-10041
6. Kono, M., Ohyama, Y., Lee, Y. C., Hamamoto, T., Kojima, N., and Tsuji, S. (1997) Mouse beta-galactoside alpha 2,3-sialyltransferases: comparison of in vitro substrate specificities and tissue specific expression. *Glycobiology* **7**, 469-479
7. Sasaki, K., Watanabe, E., Kawashima, K., Sekine, S., Dohi, T., Oshima, M., Hanai, N., Nishi, T., and Hasegawa, M. (1993) Expression cloning of a novel Gal beta (1-3/1-4) GlcNAc alpha 2,3-sialyltransferase using lectin resistance selection. *J Biol Chem* **268**, 22782-22787
8. Okajima, T., Fukumoto, S., Miyazaki, H., Ishida, H., Kiso, M., Furukawa, K., and Urano, T. (1999) Molecular cloning of a novel alpha2,3-sialyltransferase (ST3Gal VI) that sialylates type II lactosamine structures on glycoproteins and glycolipids. *J Biol Chem* **274**, 11479-11486
9. Ellies, L. G., Sperandio, M., Underhill, G. H., Yousif, J., Smith, M., Priatel, J. J., Kansas, G. S., Ley, K., and Marth, J. D. (2002) Sialyltransferase specificity in selectin ligand formation. *Blood* **100**, 3618-3625
10. Ogawa, J. I., Inoue, H., and Koide, S. (1997) alpha-2,3-Sialyltransferase type 3N and alpha-1,3-fucosyltransferase type VII are related to sialyl Lewis(x) synthesis and patient survival from lung carcinoma. *Cancer* **79**, 1678-1685
11. Ujita, M., Misra, A. K., McAuliffe, J., Hindsgaul, O., and Fukuda, M. (2000) Poly-N-acetyllactosamine extension in N-glycans and core 2- and core 4-branched O-glycans is differentially controlled by i-extension enzyme and different members of the beta 1,4-galactosyltransferase gene family. *J Biol Chem* **275**, 15868-15875



12. Clarke, J. L., and Watkins, W. (1996) Alpha 1,3-L-fucosyltransferase expression in developing human myeloid cells. Antigenic, enzymatic, and mRNA analyses. *J Biol Chem* **271**, 10317-10328
13. Nakayama, F., Nishihara, S., Iwasaki, H., Kudo, T., Okubo, R., Kaneko, M., Nakamura, M., Karube, M., Sasaki, K., and Narimatsu, H. (2001) CD15 expression in mature granulocytes is determined by alpha 1,3-fucosyltransferase IX, but in promyelocytes and monocytes by alpha 1,3-fucosyltransferase IV. *J Biol Chem* **276**, 16100-16106
14. Sasaki, K., Kurata, K., Funayama, K., Nagata, M., Watanabe, E., Ohta, S., Hanai, N., and Nishi, T. (1994) Expression cloning of a novel alpha 1,3-fucosyltransferase that is involved in biosynthesis of the sialyl Lewis x carbohydrate determinants in leukocytes. *J Biol Chem* **269**, 14730-14737
15. Murray, B. W., Wittmann, V., Burkart, M. D., Hung, S. C., and Wong, C. H. (1997) Mechanism of human alpha-1,3-fucosyltransferase V: glycosidic cleavage occurs prior to nucleophilic attack. *Biochemistry* **36**, 823-831
16. Qiao, L., Murray, B. W., Shimazaki, M., Schultz, J., and Wong, C. H. (1996) Synergistic inhibition of human alpha-1,3-fucosyltransferase V. *J Am Chem Soc* **118**, 7653-7662
17. Vallejo-Ruiz, V., Haque, R., Mir, A. M., Schwientek, T., Mandel, U., Cacan, R., Delannoy, P., and Harduin-Lepers, A. (2001) Delineation of the minimal catalytic domain of human Galbeta1-3GalNAc alpha2,3-sialyltransferase (hST3Gal I). *Biochim Biophys Acta* **1549**, 161-173
18. Kuhns, W., Rutz, V., Paulsen, H., Matta, K. L., Baker, M. A., Barner, M., Granovsky, M., and Brockhausen, I. (1993) Processing O-glycan core 1, Gal beta 1-3GalNAc alpha-R. Specificities of core 2, UDP-GlcNAc: Gal beta 1-3 GalNAc-R(GlcNAc to GalNAc) beta 6-N-acetylglucosaminyltransferase and CMP-sialic acid: Gal beta 1-3GalNAc-R alpha 3-sialyltransferase. *Glycoconj J* **10**, 381-394
19. Hinou, H., Sun, X. L., and Ito, Y. (2003) Systematic syntheses and inhibitory activities of bisubstrate-type inhibitors of sialyltransferases. *J Org Chem* **68**, 5602-5613
20. Kitagawa, H., and Paulson, J. C. (1994) Cloning of a novel alpha 2,3-sialyltransferase that sialylates glycoprotein and glycolipid carbohydrate groups. *J Biol Chem* **269**, 1394-1401
21. Preuss, U., Gu, X., Gu, T., and Yu, R. K. (1993) Purification and characterization of CMP-N-acetylneuraminic acid:lactosylceramide (alpha 2-3) sialyltransferase (GM3-synthase) from rat brain. *J Biol Chem* **268**, 26273-26278
22. Schwientek, T., Almeida, R., Levery, S. B., Holmes, E. H., Bennett, E., and Clausen, H. (1998) Cloning of a novel member of the UDP-galactose:beta-N-acetylglucosamine beta1,4-galactosyltransferase family, beta4Gal-T4, involved in glycosphingolipid biosynthesis. *J Biol Chem* **273**, 29331-29340
23. van Die, I., van Tetering, A., Schiphorst, W. E., Sato, T., Furukawa, K., and van den Eijnden, D. H. (1999) The acceptor substrate specificity of human beta4-galactosyltransferase V indicates its potential function in O-glycosylation. *FEBS Lett* **450**, 52-56
24. Ju, T., Brewer, K., D'Souza, A., Cummings, R. D., and Canfield, W. M. (2002) Cloning and expression of human core 1 beta1,3-galactosyltransferase. *J Biol Chem* **277**, 178-186
25. Shinoda, K., Morishita, Y., Sasaki, K., Matsuda, Y., Takahashi, I., and Nishi, T. (1997) Enzymatic characterization of human alpha1,3-fucosyltransferase Fuc-TVII synthesized in a B cell lymphoma cell line. *J Biol Chem* **272**, 31992-31997
26. Zhou, D., Dinter, A., Gutierrez Gallego, R., Kamerling, J. P., Vliegenthart, J. F., Berger, E. G., and Hennet, T. (1999) A beta-1,3-N-acetylglucosaminyltransferase with poly-N-

- Marathe, Chandrasekaran, Lau, Matta and Neelamegham (2008)
- acetyllactosamine synthase activity is structurally related to beta-1,3-galactosyltransferases. *Proc Natl Acad Sci U S A* **96**, 406-411
27. Bennett, E. P., Hassan, H., Mandel, U., Mirgorodskaya, E., Roepstorff, P., Burchell, J., Taylor-Papadimitriou, J., Hollingsworth, M. A., Merkx, G., van Kessel, A. G., Eiberg, H., Steffensen, R., and Clausen, H. (1998) Cloning of a human UDP-N-acetyl-alpha-D-Galactosamine:polypeptide N-acetylgalactosaminyltransferase that complements other GalNAc-transferases in complete O-glycosylation of the MUC1 tandem repeat. *J Biol Chem* **273**, 30472-30481
  28. Jain, R. K., Piskorz, C. F., Chandrasekaran, E. V., and Matta, K. L. (1998) Synthesis of Gal-beta-(1-->4)-GlcNAc-beta-(1-->6)-[Gal-beta-(1-->3)-GalNAc-alpha-OBn oligosaccharides bearing O-methyl or O-sulfo groups at C-3 of the Gal residue: specific acceptors for Gal: 3-O-sulfotransferases. *Glycoconj J* **15**, 951-959
  29. Jain, R. K., Piskorz, C. F., Huang, B. G., Locke, R. D., Han, H. L., Koenig, A., Varki, A., and Matta, K. L. (1998) Inhibition of L- and P-selectin by a rationally synthesized novel core 2-like branched structure containing GalNAc-Lewisx and Neu5Acalpha2-3Galbeta1-3GalNAc sequences. *Glycobiology* **8**, 707-717
  30. Sarkar, A. K., Jain, R. K., and Matta, K. L. (1990) Synthesis of benzyl O-(2-O-methyl-beta-D-galactopyranosyl)-(1----3)-2-acetamido-2-deoxy-beta-D-glucopyranoside [benzyl 2'-O-methyl-lacto-N-bioside I], and its higher saccharide containing an O-(2-O-methyl-beta-D-galactopyranosyl)-(1----3)-2-acetamido-2-deoxy-beta-D-glucopyranosyl group as a potential substrate for (1---4)-alpha-L-fucosyltransferase. *Carbohydr Res* **203**, 33-46
  31. Xia, J., Alderfer, J. L., Piskorz, C. F., Locke, R. D., and Matta, K. L. (2000) A convergent synthesis of trisaccharides with alpha-Neu5Ac-(2 --> 3)-beta-D-gal-(1 --> 4)-beta-D-GlcNAc and alpha-Neu5Ac-(2 --> 3)-beta-D-gal-(1 --> 3)-alpha-D-GalNAc sequences. *Carbohydr Res* **328**, 147-163
  32. Xia, J., Alderfer, J. L., Piskorz, C. F., Locke, R. D., and Matta, K. L. (2003) *Synlett.* **9**, 1291-1294
  33. Tomiya, N., Ailor, E., Lawrence, S. M., Betenbaugh, M. J., and Lee, Y. C. (2001) Determination of nucleotides and sugar nucleotides involved in protein glycosylation by high-performance anion-exchange chromatography: sugar nucleotide contents in cultured insect cells and mammalian cells. *Anal Biochem* **293**, 129-137
  34. Chandrasekaran, E. V., Xue, J., Xia, J., Locke, R. D., Matta, K. L., and Neelamegham, S. (2008) Reversible Sialylation: Synthesis of Cytidine 5'-Monophospho-N-acetylneuraminic Acid from Cytidine 5'-Monophosphate with alpha2,3-Sialyl O-Glycan-, Glycolipid-, and Macromolecule-Based Donors Yields Diverse Sialylated Products(dagger). *Biochemistry* **47**, 320-330
